# Supplementary material
Source: MDPI journal article supplement (https://www.mdpi.com/2297-8739/10/6/340)
Supplement: s1 [file s1]

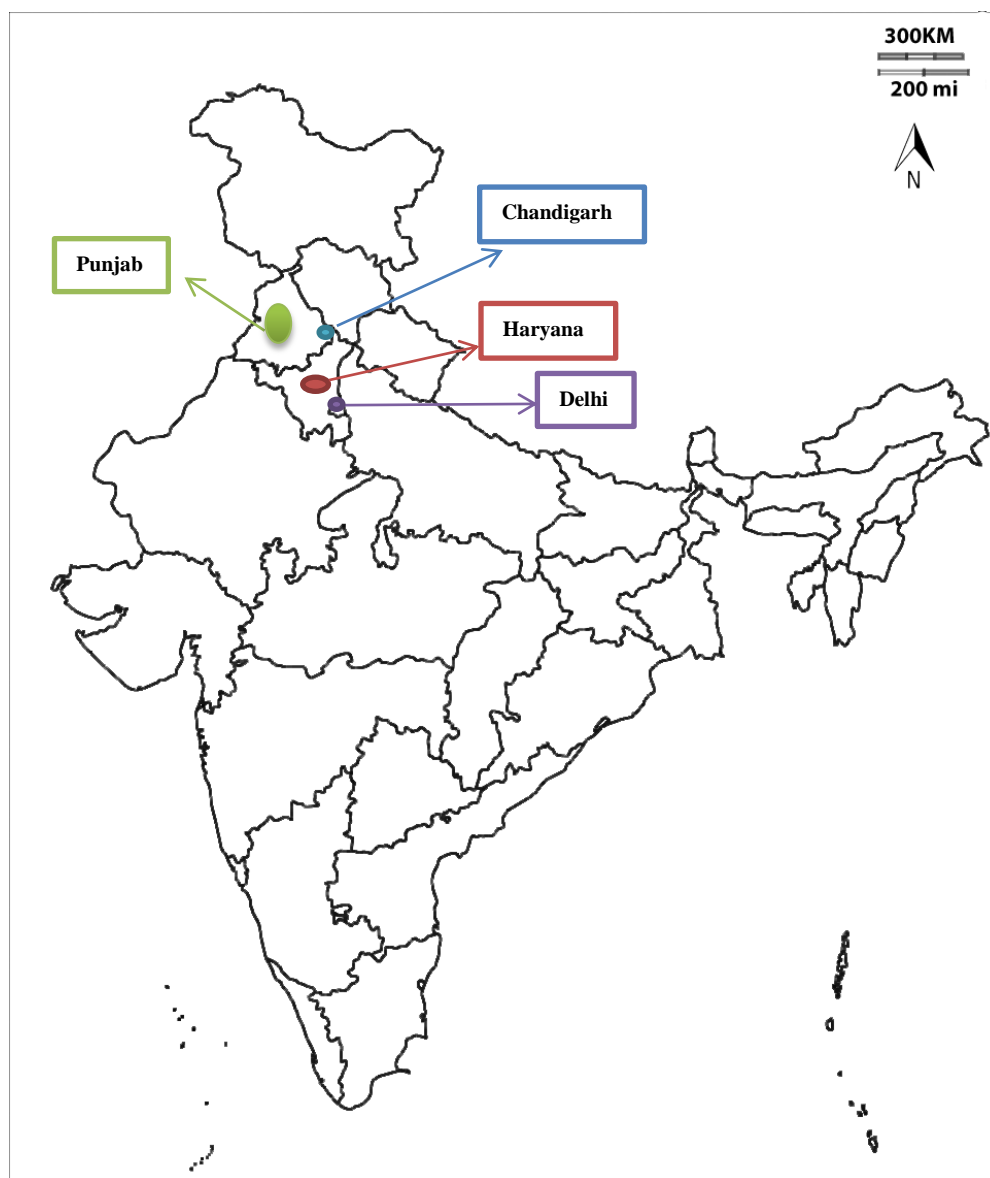

**Figure S1.** Map of India showing states from where various accessions were collected

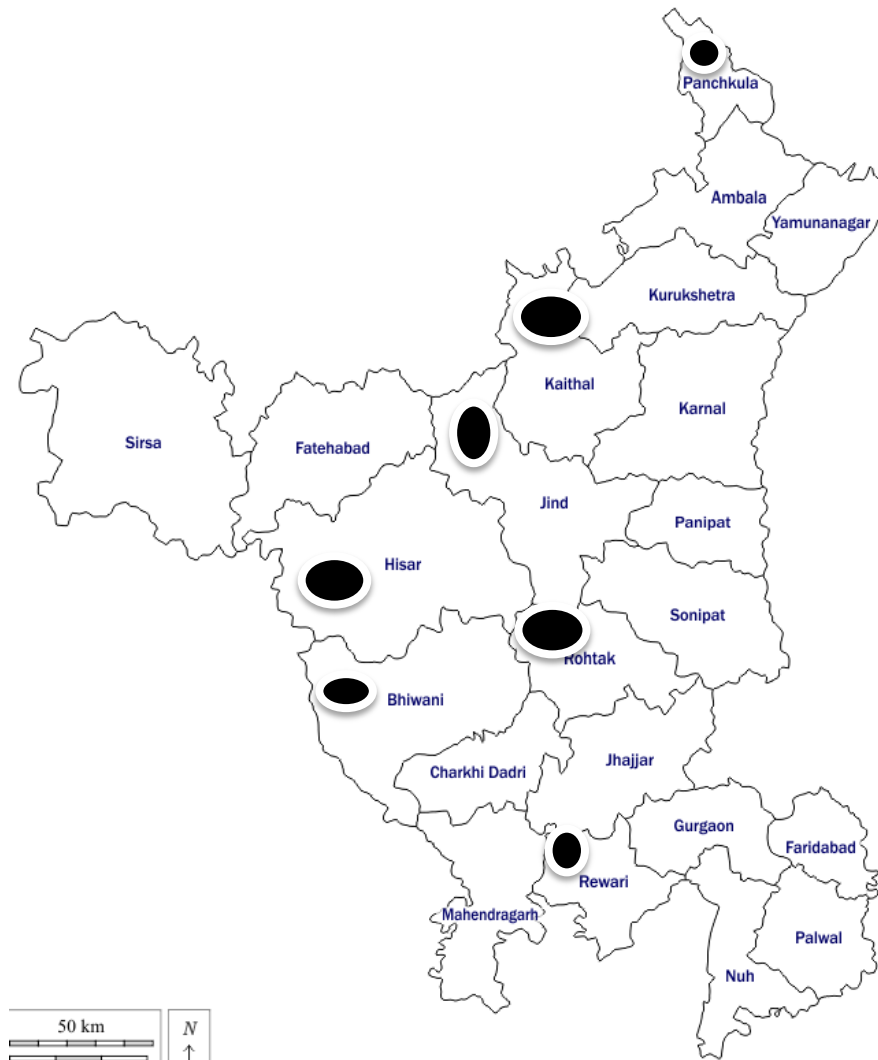

**Figure S2.** Districts of Haryana from where 14 accessions were collected

**A**

RT: 4.00 - 24.77 SM: 7G

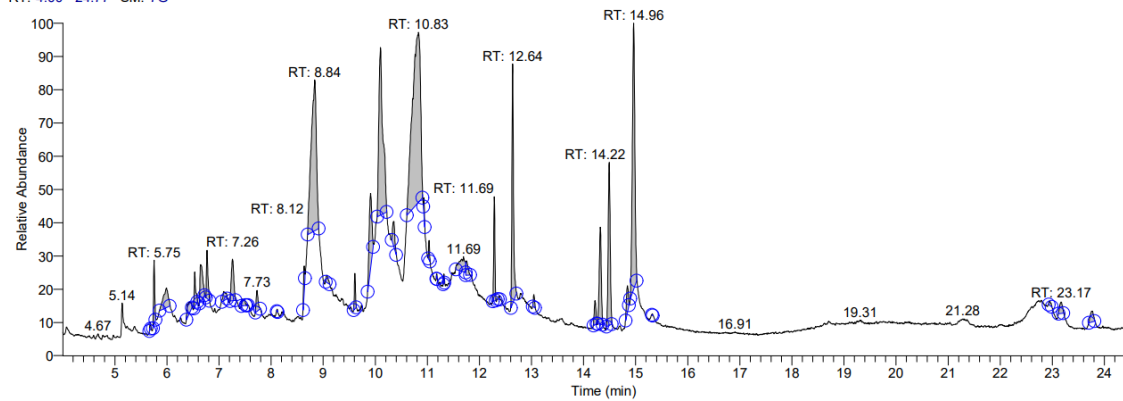**B**

RT: 4.00 - 24.78 SM: 7G

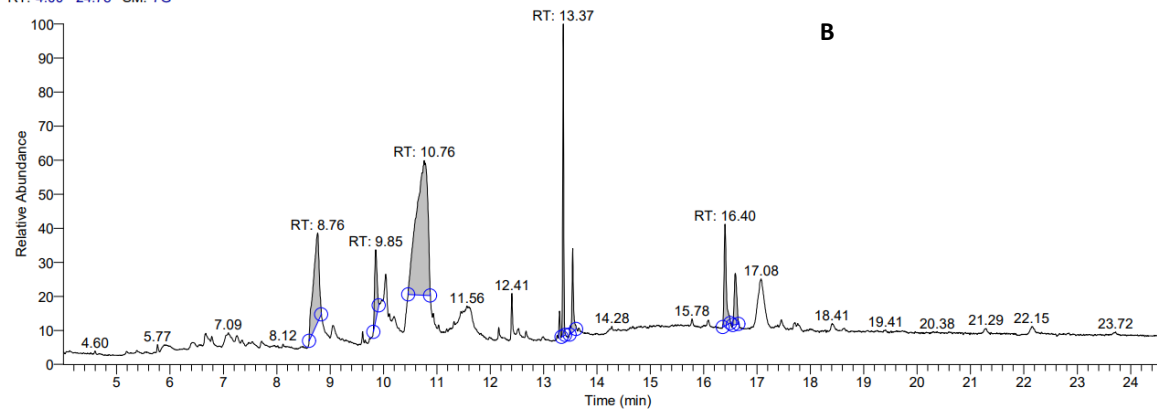

RT: 4.00 - 24.76 SM: 7G

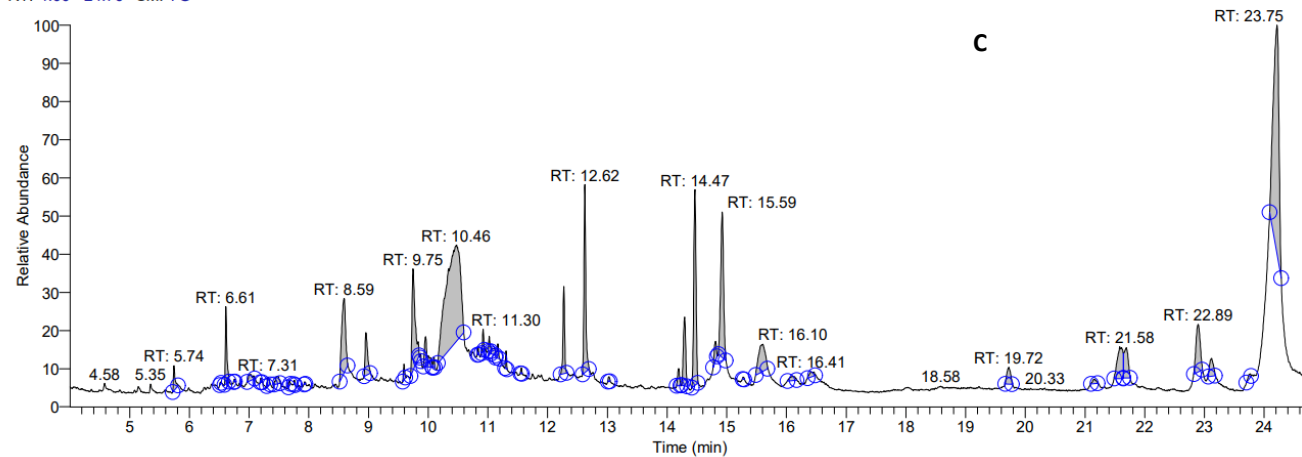

RT: 4.00 - 26.77 SM: 7G

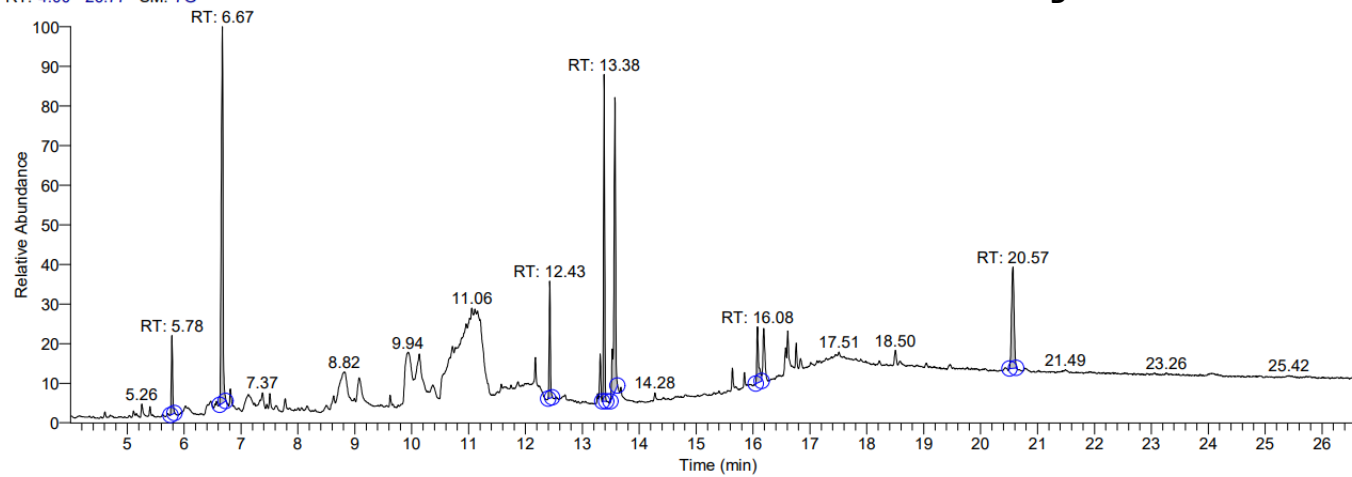

RT: 4.00 - 24.77 SM: 7G

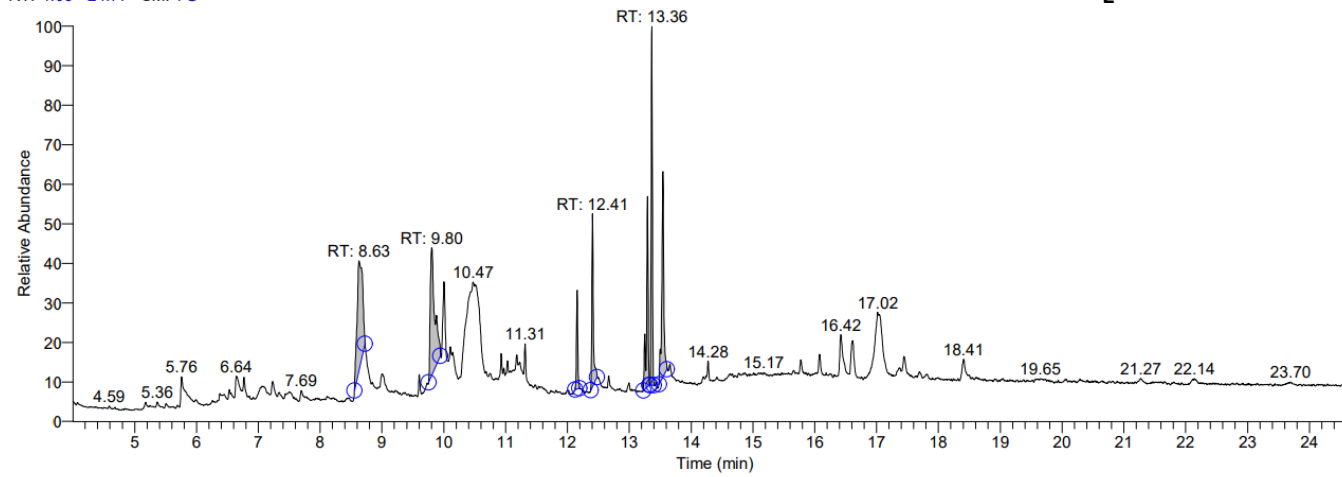

RT: 4.00 - 24.78 SM: 7G

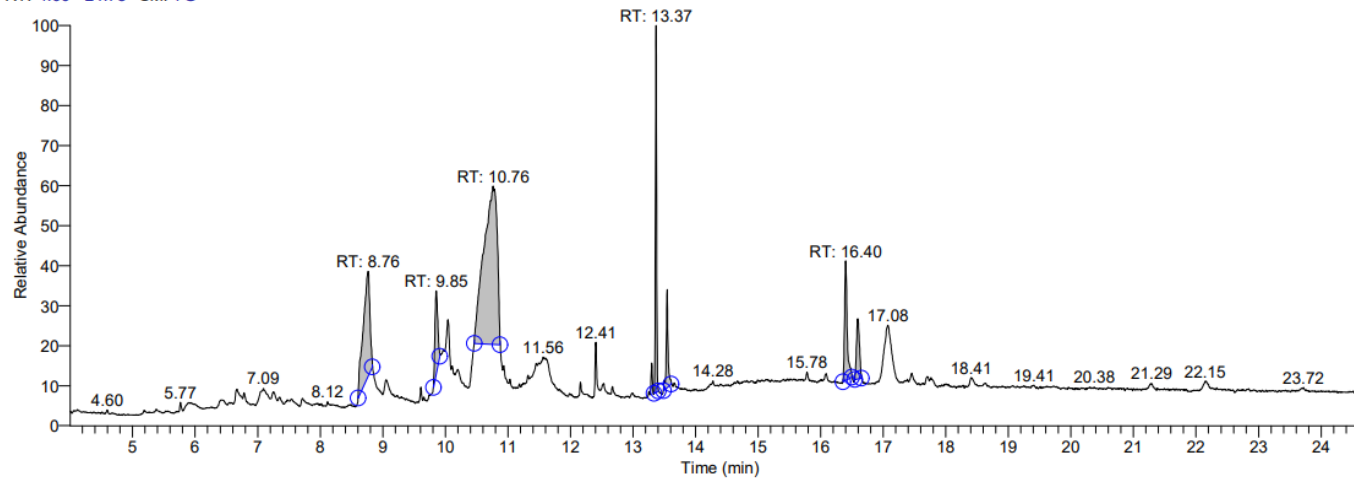

RT: 4.00 - 24.78 SM: 7G

G

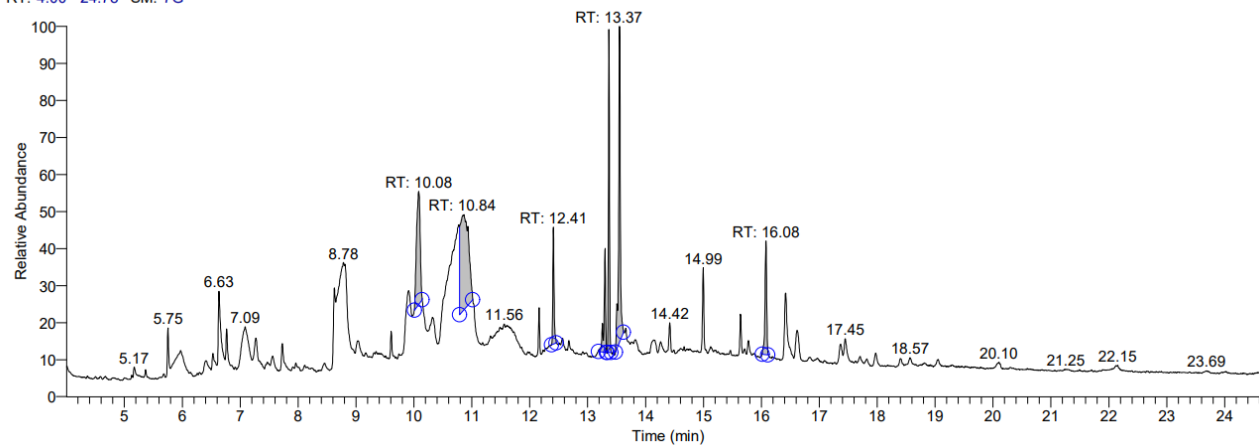

Activate Windows

RT: 4.00 - 24.75 SM: 7G

H

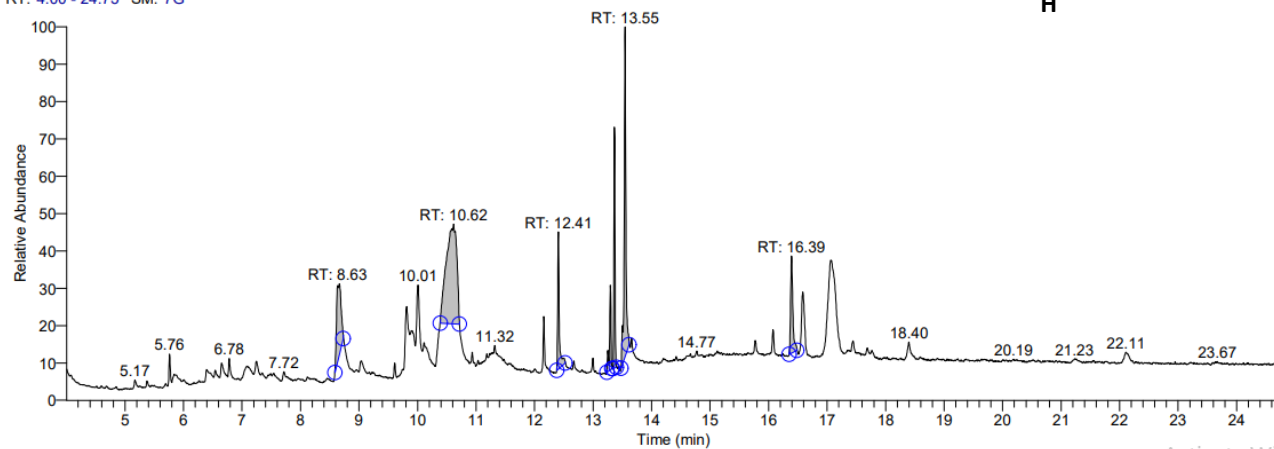

Activate Windows

RT: 4.00 - 24.75 SM: 7G

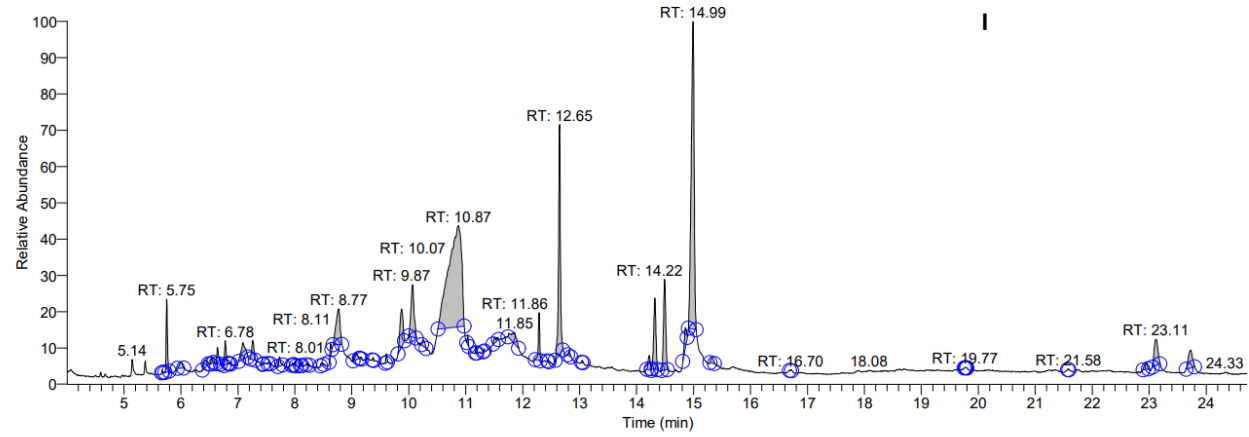

RT: 4.00 - 24.76 SM: 7G

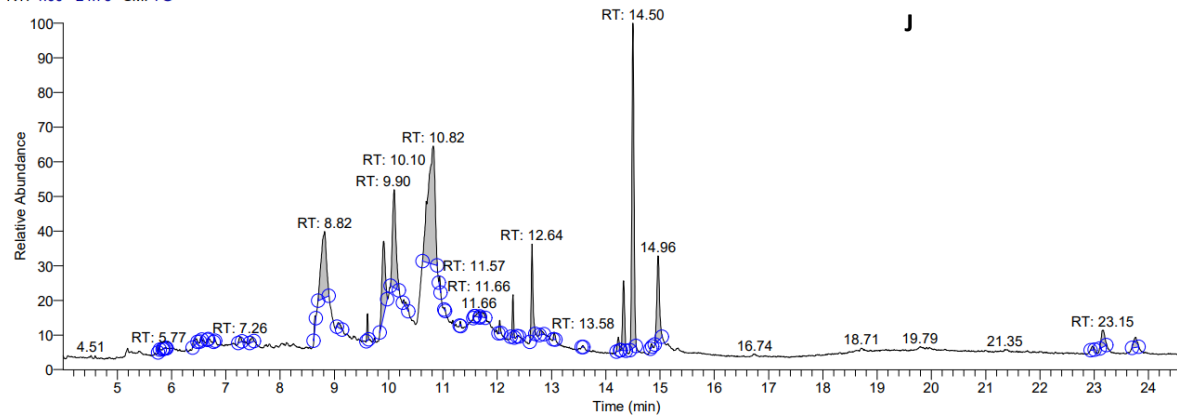

RT: 4.00 - 24.76 SM: 7G

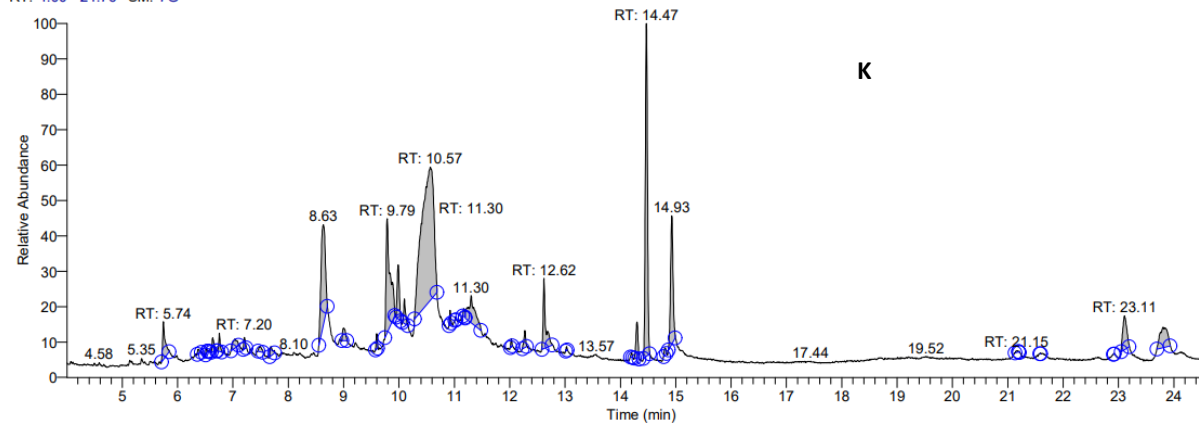

RT: 4.00 - 24.76 SM: 7G

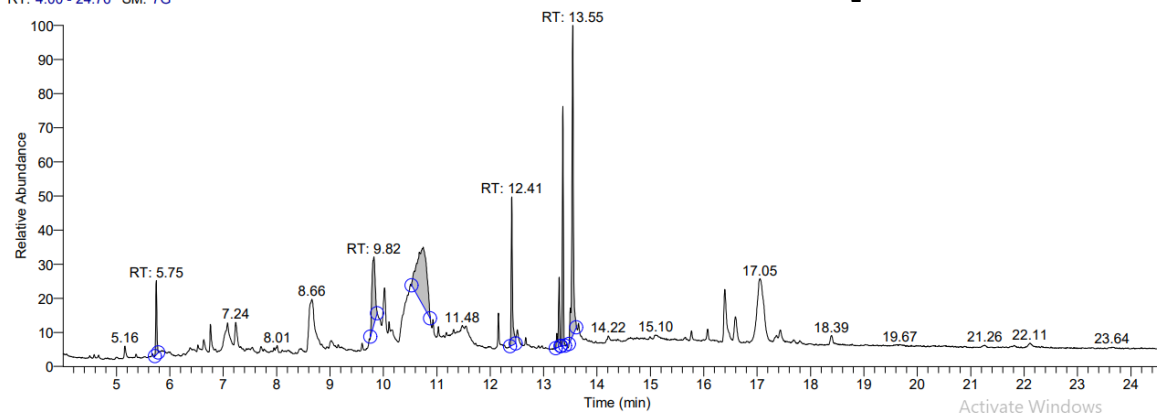

Activate Windows  
Go to Settings to activate Windows.



RT: 4.00 - 26.77 SM: 7G

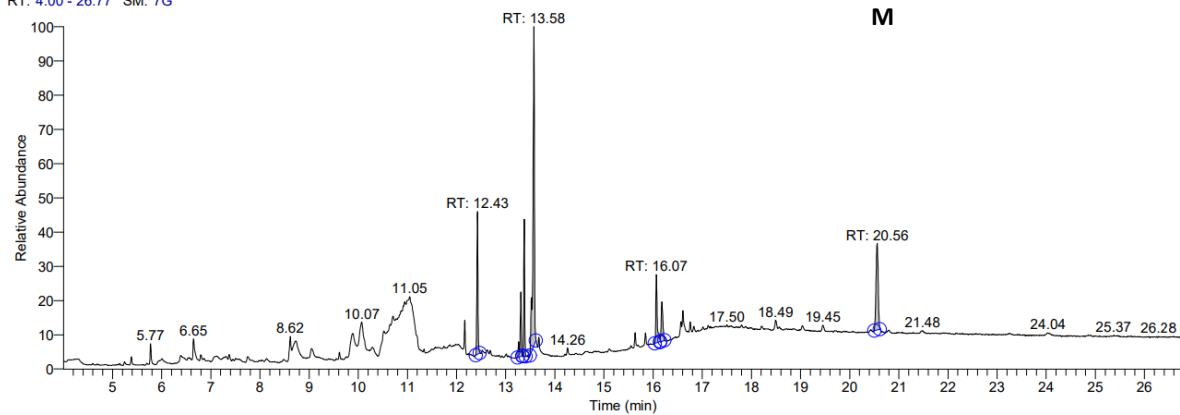

RT: 4.00 - 26.77 SM: 7G

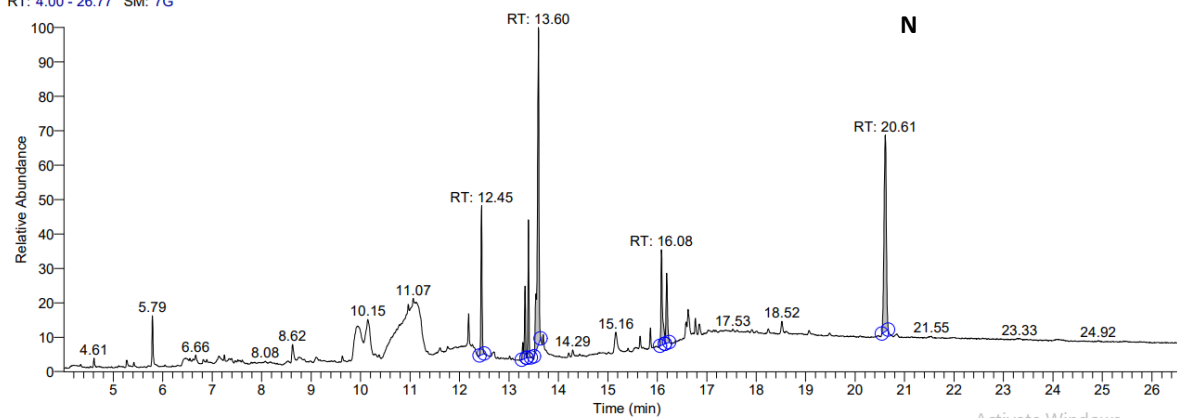

Activate Windows

RT: 4.00 - 24.77 SM: 7G

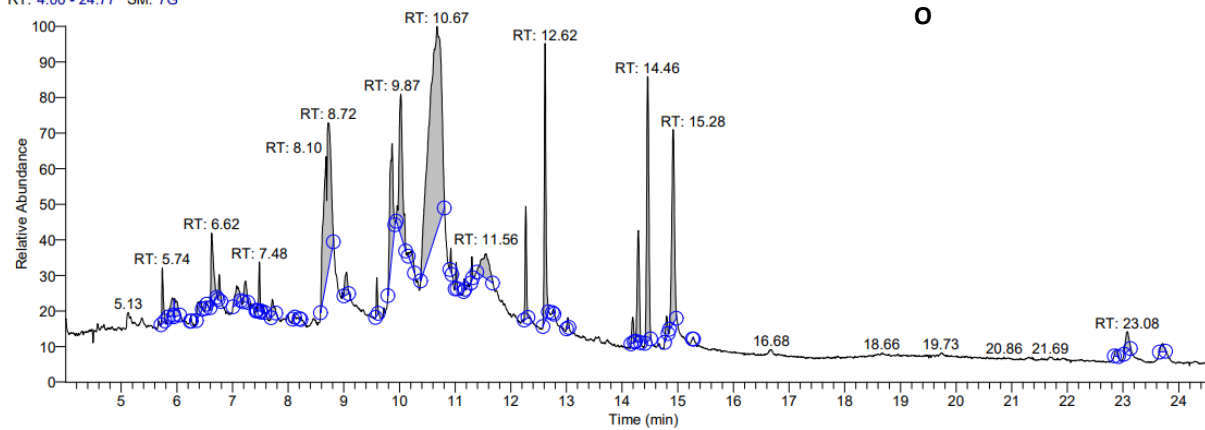

O

RT: 4.00 - 24.77 SM: 7G

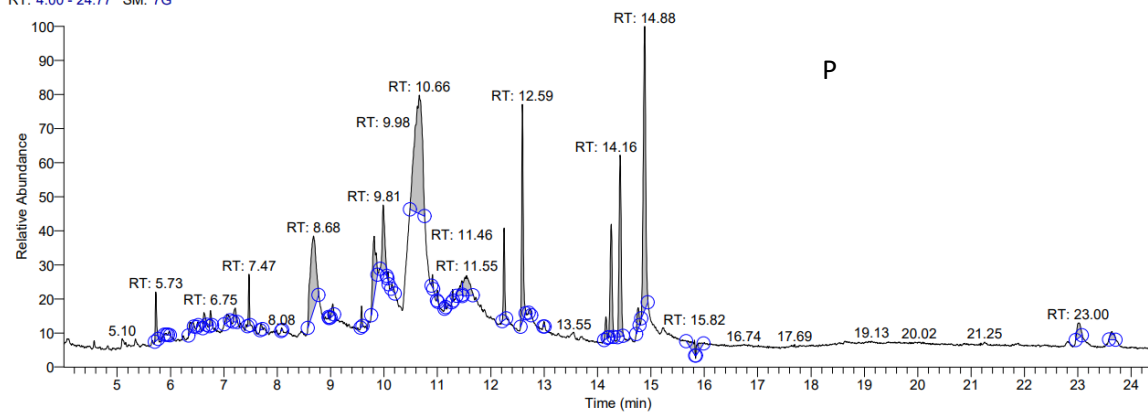

P

Q

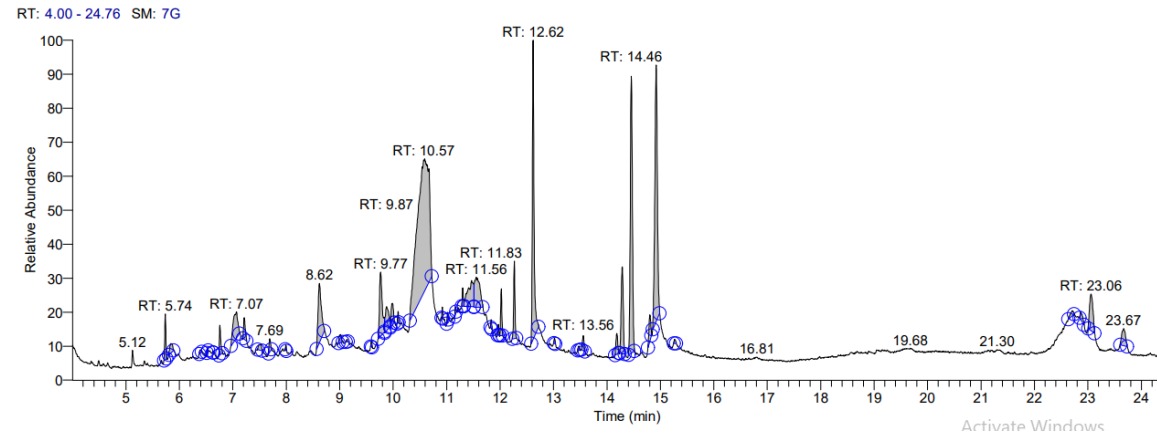

R

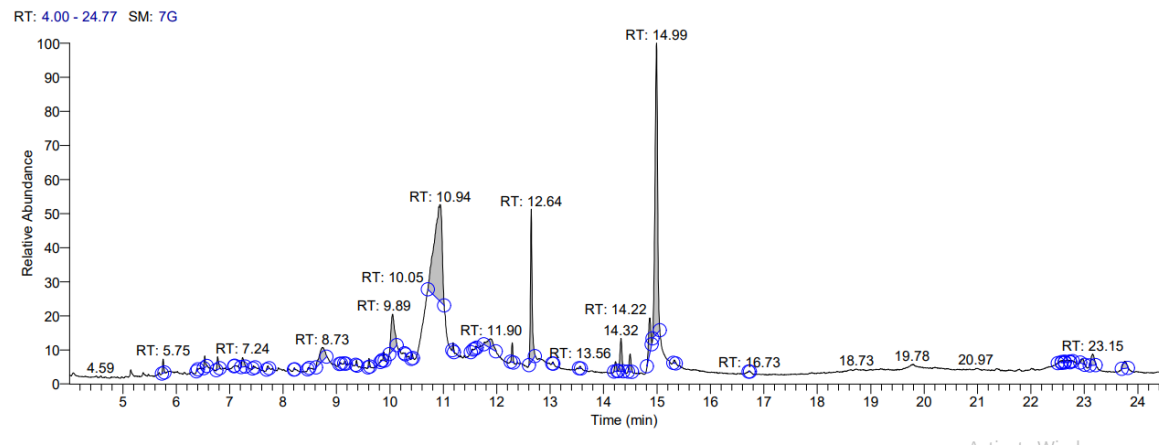

RT: 4.00 - 24.78 SM: 7G

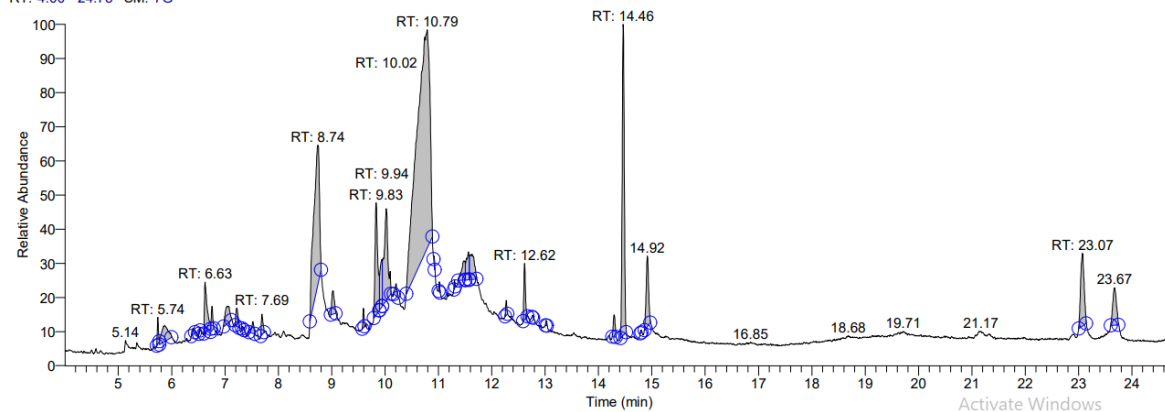

RT: 4.00 - 26.77 SM: 7G

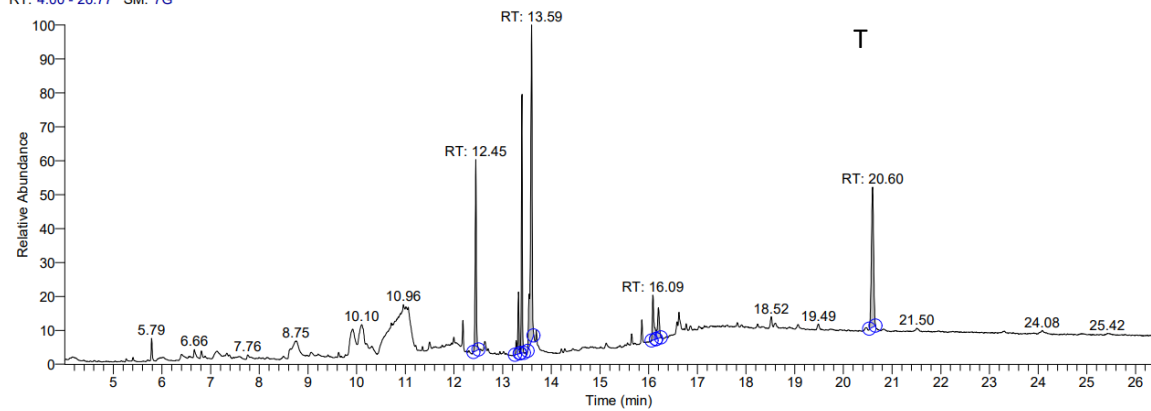

RT: 4.00 - 24.76 SM: 7G

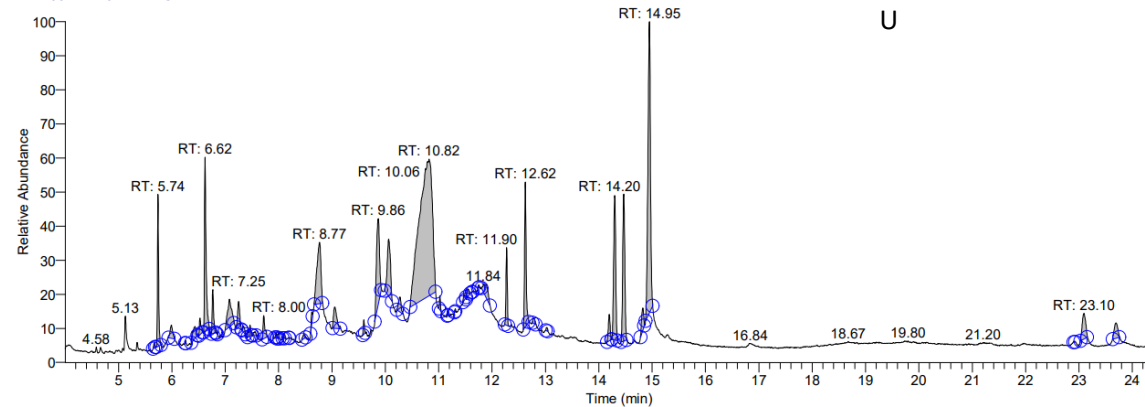

RT: 4.00 - 24.76 SM: 7G

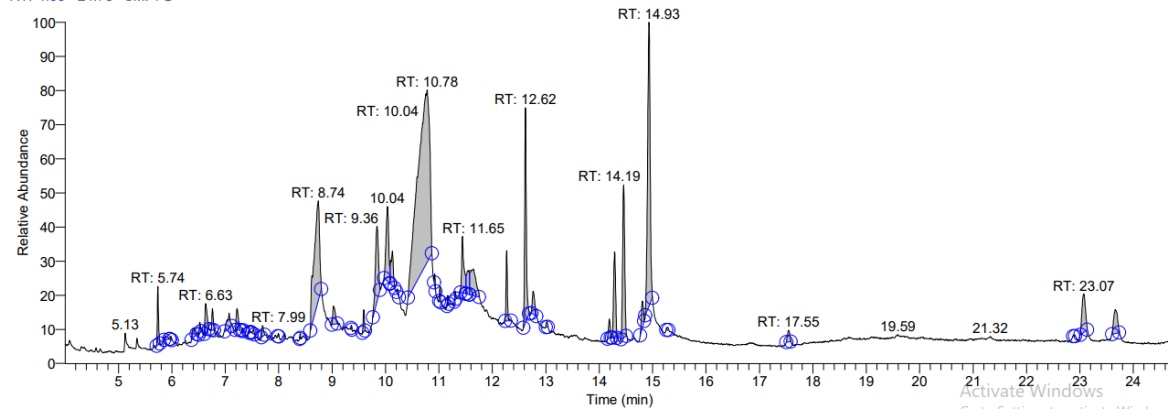

W

RT: 4.00 - 24.79 SM: 7G

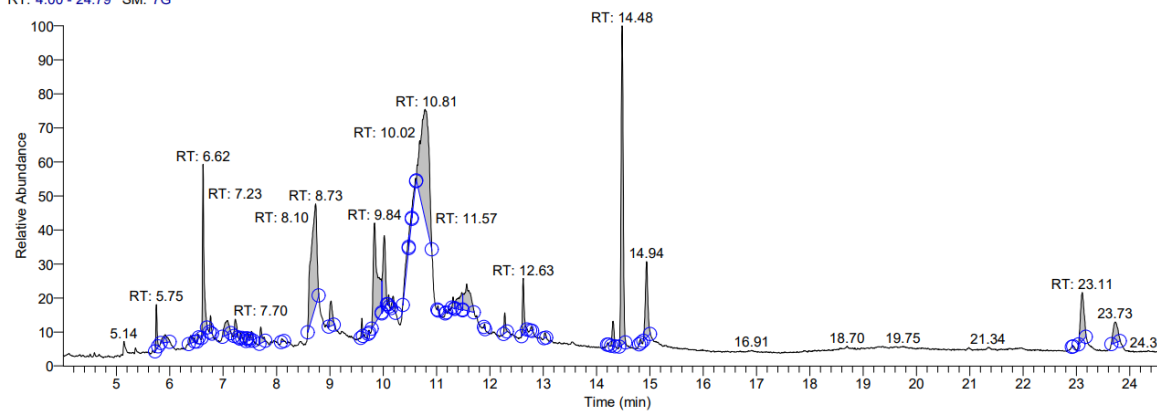

X

RT: 4.00 - 24.78 SM: 7G

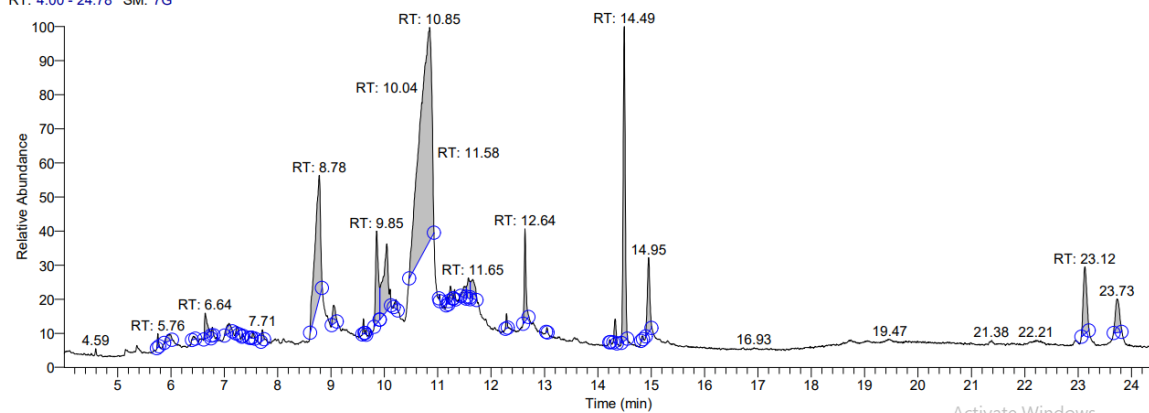

Activate Windows

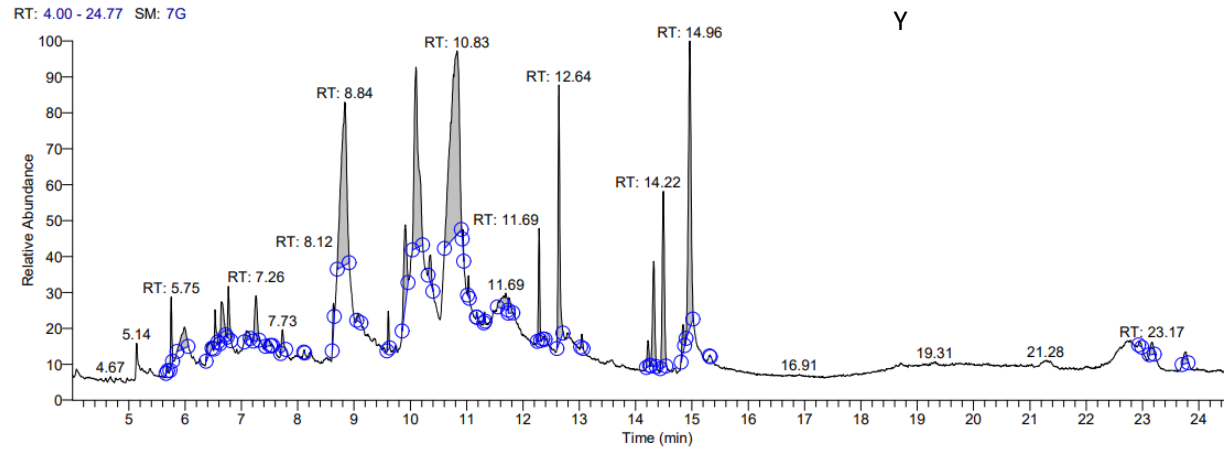

**Figure S3.** GC-MS chromatogram of methanolic leaf extracts of 25 accessions of *Catharanthus roseus*

(A) Cr00PFRE, (B) Cr00LPFLPE, (C) Cr00DPF, (D) Cr00WFYE, (E) Cr00WFRE, (F) Cr00WFRE2, (G) Cr00WFSRE, (H) Cr00WFYE2, (I) Cr00DP, (J) Cr00LP, (K) Cr00BPF, (L) Cr00SFP, (M) Cr00CAF, (N) Cr00LPNF, (O) Cr00SBRF, (P) Cr00PLMF, (Q) Cr00CHEF, (R) Cr00SNFF, (S) Cr00CLF, (T) Cr00SAF, (U) Cr00TDRF, (V) Cr00 DRYE, (W) Cr00FRFF, (X) Cr00PFWE, (Y) Cr00PFYE

**Table (S1).** Comparative analysis of phytochemicals in 25 *Catharanthus roseus* accessions

| Name of compounds                                                                      | Name of accessions | A | B | C | D | E | F | G | H | I | J | K | L | M | N | O | P | Q | R | S | T | U | V | W | X | Y |
|----------------------------------------------------------------------------------------|--------------------|---|---|---|---|---|---|---|---|---|---|---|---|---|---|---|---|---|---|---|---|---|---|---|---|---|
| 4H-Pyran-4-one                                                                         |                    | + | + | + | + | + | - | - | + | + | - | + | + | + | + | - | + | + | + | + | + | + | - | + | + | - |
| Catechol/Resorcinol                                                                    |                    | + | - | - | - | - | - | - | + | + | - | - | - | - | - | - | + | - | - | - | + | + | - | + | + | - |
| Benzofuran, 2,3-dihydro                                                                |                    | + | - | + | + | - | - | - | + | + | + | - | + | - | + | + | + | + | + | + | + | + | + | + | - | + |
| 5Hydroxymethylfurfural                                                                 |                    | + | - | - | + | - | - | - | - | - | - | - | - | - | - | - | - | - | - | + | - | - | + | - | + | - |
| 1,2,3-Propanetriol, 1-acetate/acetin                                                   |                    | - | - | - | - | - | - | - | - | + | - | - | - | - | + | - | - | - | + | + | - | + | - | - | - | - |
| L-Glucose                                                                              |                    | - | - | - | + | - | - | - | - | + | - | - | - | - | - | - | - | - | - | + | - | - | + | - | + | - |
| Ascaridole epoxide                                                                     |                    | - | - | - | - | - | - | - | - | + | - | - | - | - | - | + | + | - | - | + | - | - | - | - | - | - |
| Deoxyspergualin                                                                        |                    | - | - | - | - | - | - | - | - | - | - | - | - | - | - | - | + | - | - | + | - | + | - | - | + | - |
| Sucrose                                                                                |                    | + | + | + | + | + | + | + | + | + | - | + | + | - | - | + | + | + | + | + | + | - | - | + | + | - |
| D-fructose                                                                             |                    | + | + | + | + | - | - | + | + | + | - | + | - | - | + | - | + | - | + | + | - | - | + | - | + | + |
| D-allose                                                                               |                    | + | + | + | + | - | - | + | + | + | - | - | + | + | - | - | + | - | + | - | - | + | - | + | + | - |
| Desulphosinigrin                                                                       |                    | + | - | - | - | - | - | - | - | + | - | - | - | - | - | - | + | - | - | - | - | - | - | + | - | - |
| 3',5'-Dimethoxyacetophenone                                                            |                    | + | - | - | - | - | - | - | - | + | - | - | - | - | - | - | - | - | - | - | - | - | + | + | + | - |
| $\alpha$ -D-Glucopyranoside, O- $\alpha$ -Dglucopyranosyl-(1.fwdarw.3)- $\beta$ -d-fru |                    | + | - | - | - | - | - | - | - | + | - | - | - | - | - | - | - | - | - | + | - | - | + | - | - | - |
| 1,2,3,5-Cyclohexanetetrol+                                                             |                    | + | + | + | + | - | - | + | + | + | + | + | + | + | + | - | + | + | + | + | - | - | - | - | - | - |
| Quinic acid                                                                            |                    | + | + | + | - | - | - | + | + | + | - | - | - | - | - | - | + | + | + | + | - | - | - | - | - | - |
| Myo-Inositol, 4-C-methyl-                                                              |                    | + | + | - | - | - | - | - | - | + | - | - | + | + | - | - | + | + | + | - | - | - | - | - | - | - |
| Muco-Inositol                                                                          |                    | + | + | + | - | + | + | - | + | + | - | - | + | + | - | - | + | + | + | - | - | - | - | - | - | - |
| Hexadecanoic acid, methyl ester                                                        |                    | + | + | + | - | - | - | - | - | + | + | + | + | - | - | - | + | + | - | - | - | - | - | - | - | - |
| Pentadecanoic acid                                                                     |                    | + | - | - | - | - | - | - | - | - | - | - | - | - | - | - | - | - | - | - | - | - | + | - | - | - |
| Phytol                                                                                 |                    | + | + | - | + | - | - | - | + | + | + | - | + | - | - | - | + | + | + | - | - | - | - | - | - | - |
| 9,12,15-Octadecatrienoic acid, methyl ester                                            |                    | + | + | + | + | + | - | + | + | + | + | - | + | - | - | - | + | + | + | + | - | - | - | - | - | - |
| 2,20-Cycloaspidospermidine-3-carboxylic acid                                           |                    | + | + | - | - | + | + | - | + | + | + | - | + | - | - | + | + | + | + | + | - | - | - | - | + | - |
| Vindoline                                                                              |                    | + | + | - | - | + | + | - | + | + | + | - | + | - | - | + | + | + | + | + | + | - | - | - | + | - |
| 9,12,15-Octadecatrienoic acid,                                                         |                    | + | + | - | + | + | - | - | + | + | + | + | + | - | - | - | + | + | + | + | + | - | - | - | - | - |
| Octadecane, 3-ethyl-5-(2-ethylbutyl)-                                                  |                    | + | + | - | + | - | - | - | + | + | + | - | + | - | - | - | + | + | + | + | + | - | - | - | + | - |
| Aspidospermidine-3-carboxylic acid                                                     |                    | + | + | + | + | + | + | - | + | + | + | + | + | - | + | + | + | + | + | + | + | + | + | + | + | + |
| vindoline                                                                              |                    | + | + | + | + | + | + | - | + | + | + | + | + | - | + | + | + | + | + | + | + | + | + | + | + | + |
| Condylan, 14,19-didehydro-12-methoxy-, (14E)-                                          |                    | + | - | + | - | - | - | - | - | + | - | - | - | - | - | - | - | - | - | - | - | - | - | - | - | - |
| Phthalic acid, di(oct-3-yl) ester                                                      |                    | + | - | + | - | - | - | + | - | + | + | + | - | - | - | + | - | - | + | - | - | - | - | - | - | - |

**+= Presence ; -= Absence**

(A) Cr00PFRE, (B) Cr00LPFLPE, (C) Cr00DPF, (D)Cr00WFYE, (E) Cr00WFRE, (F) Cr00WFRE2, (G) Cr00WFSRE, (H) Cr00WFYE2, (I) Cr00DP, (J) Cr00LP, (K) Cr00BPF, (L) Cr00SFP (M) Cr00CAF, (N) Cr00LPNF, (O)Cr00SBRF, (P) Cr00PLMF, (Q) Cr00CHEF, (R) Cr00SNFF, (S) Cr00CLF, (T) Cr00SAF, (U) Cr00TDRF, (V) Cr00 DRYE, (W) Cr00FRFF, (X) Cr00PFWE, (Y) Cr00PFYE
